# Supplementary material for: Microscale droplets covered by amphiphilic gold nanoparticles with various ligand ratios and concentrations
Source: Royal Society of Chemistry journal article supplement (doi:10.1039/c9sm00505f), 2019-01-01
Supplement: c9sm00505f1.pdf [file c9sm00505f1.pdf]

## Supporting Information for

### Microscale droplets covered by amphiphilic gold nanoparticles with various ligand ratios and concentrations

Yeon-Geon Jung<sup>a</sup>, Chae-Rim Lee<sup>a</sup>, Hee-Jin Lee<sup>b</sup>, Ji Woong Chang<sup>a,\*</sup> and Hee-Young Lee<sup>a,\*</sup>

a. Department of Chemical Engineering, The Kumoh National Institute of Technology, 61, Daehak-ro, Gumi-si, Gyeongsangbuk-do, 39177, Republic of Korea.

b. Department of Electronic Engineering, The Kumoh National Institute of Technology, 61, Daehak-ro, Gumi-si, Gyeongsangbuk-do, 39177, Republic of Korea.

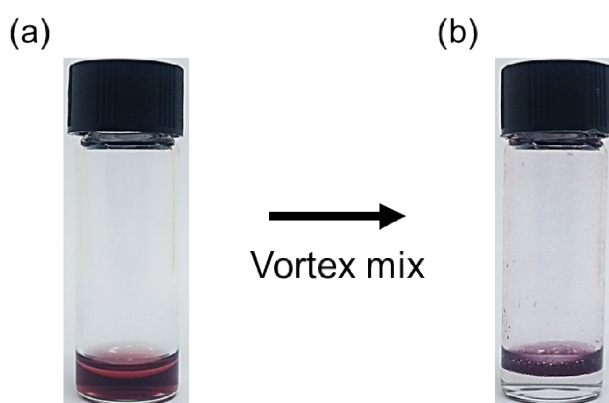

Figure S1. The hexane-water mixtures containing AuMUA/ODT NPs. (a) AuMUA/ODT NPs were initially dissolved in the water phase. (b) After gently vortex mixing for 15 min, the AuMUA/ODT NPs migrated to the hexane-water interface forming the hexane droplets covered with the AuMUA/ODT NPs.

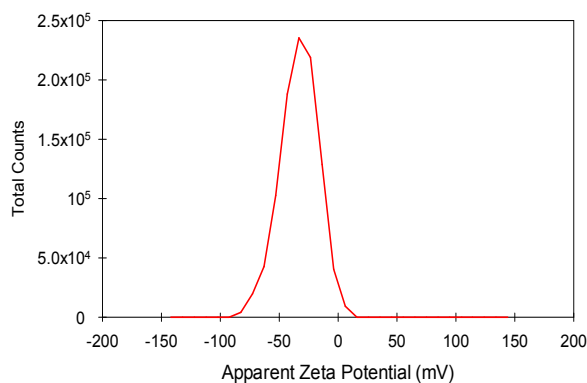

Figure S2.  $\zeta$  potential distributions for 1 mM of amphiphilic AuNPs at  $\chi_{\text{surface}}^{\text{ODT/MUA}} = 0.41$ .

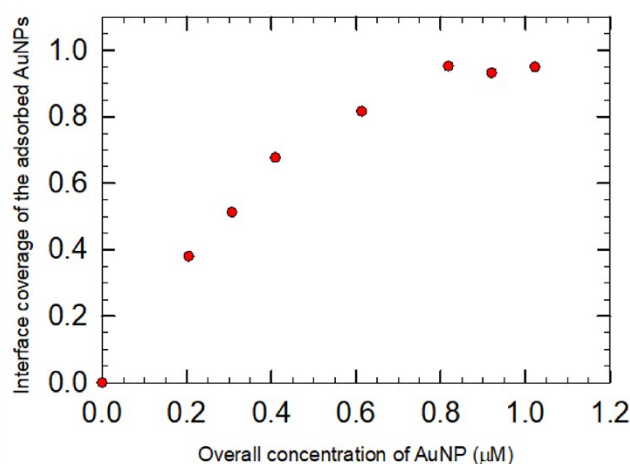

Figure S3. The estimated values of interface coverage of AuNPs as a function of overall concentration of AuNPs.

Table S1. Absorbance peaks of AuMUA/ODT NPs remaining in the water phase with varying  $\chi^{\text{ODT/MUA}}_{\text{surface}}$  before and after vortex mixing. The extent of the AuNP adsorption at the hexane-water interface was calculated based on the absorbance peak.

| $\chi^{\text{ODT/MUA}}_{\text{surface}}$ | Absorbance peak of AuMUA/ODT NPs in the water phase |                     | The extent of the AuNP adsorption at the hexane-water interface (%) |
|------------------------------------------|-----------------------------------------------------|---------------------|---------------------------------------------------------------------|
|                                          | Before vortex mixing                                | After vortex mixing |                                                                     |
| 0                                        | 0.31                                                | 0.31                | 0                                                                   |
| 0.09                                     | 0.31                                                | 0.16                | 48                                                                  |
| 0.22                                     | 0.31                                                | 0.12                | 61                                                                  |
| 0.41                                     | 0.31                                                | 0.050               | 84                                                                  |
| 0.59                                     | 0.31                                                | 0.031               | 90                                                                  |

Table S2. The summary of CIELAB analysis.

| Figure number | a* for droplets | a* for solvent | $\Delta a^*$ |
|---------------|-----------------|----------------|--------------|
| 4a            | $2.0 \pm 0.7$   | $4.1 \pm 0.4$  | -2.1         |
| 4b            | $1.3 \pm 0.2$   | $0.0 \pm 0.1$  | 1.3          |
| 4c            | $3.5 \pm 0.6$   | $-0.1 \pm 0.3$ | 3.6          |
| 4d            | $6.3 \pm 0.7$   | $2.3 \pm 0.4$  | 4.0          |
| 6a            | $3.6 \pm 0.4$   | $-0.1 \pm 0.5$ | 3.6          |
| 6b            | $6.4 \pm 1.1$   | $5.8 \pm 0.3$  | 0.6          |
| 9c            | $6.4 \pm 0.7$   | $2.6 \pm 0.3$  | 3.8          |

Table S3. The concentration (mM on an atom basis) of AuNPs that migrated to the hexane-water interface depending on the overall concentration (mM on an atom basis) of AuNPs.

| Concentration of the overall AuNPs (mM) | Absorbance peak of AuMUA/ODT NPs in the water phase |                     | The concentration of the migrated AuNPs to the hexane-water interface (mM on an atom basis) |
|-----------------------------------------|-----------------------------------------------------|---------------------|---------------------------------------------------------------------------------------------|
|                                         | Before vortex mixing                                | After vortex mixing |                                                                                             |
| 1                                       | 0.31                                                | 0.050               | 0.85                                                                                        |
| 1.5                                     | 0.46                                                | 0.11                | 1.15                                                                                        |
| 2                                       | 0.61                                                | 0.15                | 1.51                                                                                        |
| 3                                       | 0.92                                                | 0.36                | 1.84                                                                                        |
| 4                                       | 1.22                                                | 0.57                | 2.13                                                                                        |
| 4.5                                     | 1.37                                                | 0.74                | 2.07                                                                                        |
| 5                                       | 1.52                                                | 0.87                | 2.13                                                                                        |
